# Supplementary material for: Chemical CO2 fixation using a cyanido bridged heterometallic Zn(ii)–Mn(ii) 2D coordination polymer
Source: Royal Society of Chemistry journal article supplement (doi:10.1039/d4dt01630k), 2024-01-01
Supplement: d4dt01630k1.pdf [file d4dt01630k1.pdf]

## Supporting information file

# Chemical CO<sub>2</sub> fixation by cyanido bridged heterometallic Mn(II)-Zn(II) 2D coordination polymer

Parvaneh Dadmehr,<sup>a</sup> Rahman Bikas,<sup>a,\*</sup> Tadeusz Lis,<sup>b</sup>

<sup>a</sup> Department of Chemistry, Faculty of Science, Imam Khomeini International University, 34148-96818, Qazvin, Iran

<sup>b</sup> Faculty of Chemistry, University of Wrocław, Joliot-Curie 14, Wrocław 50-383, Poland

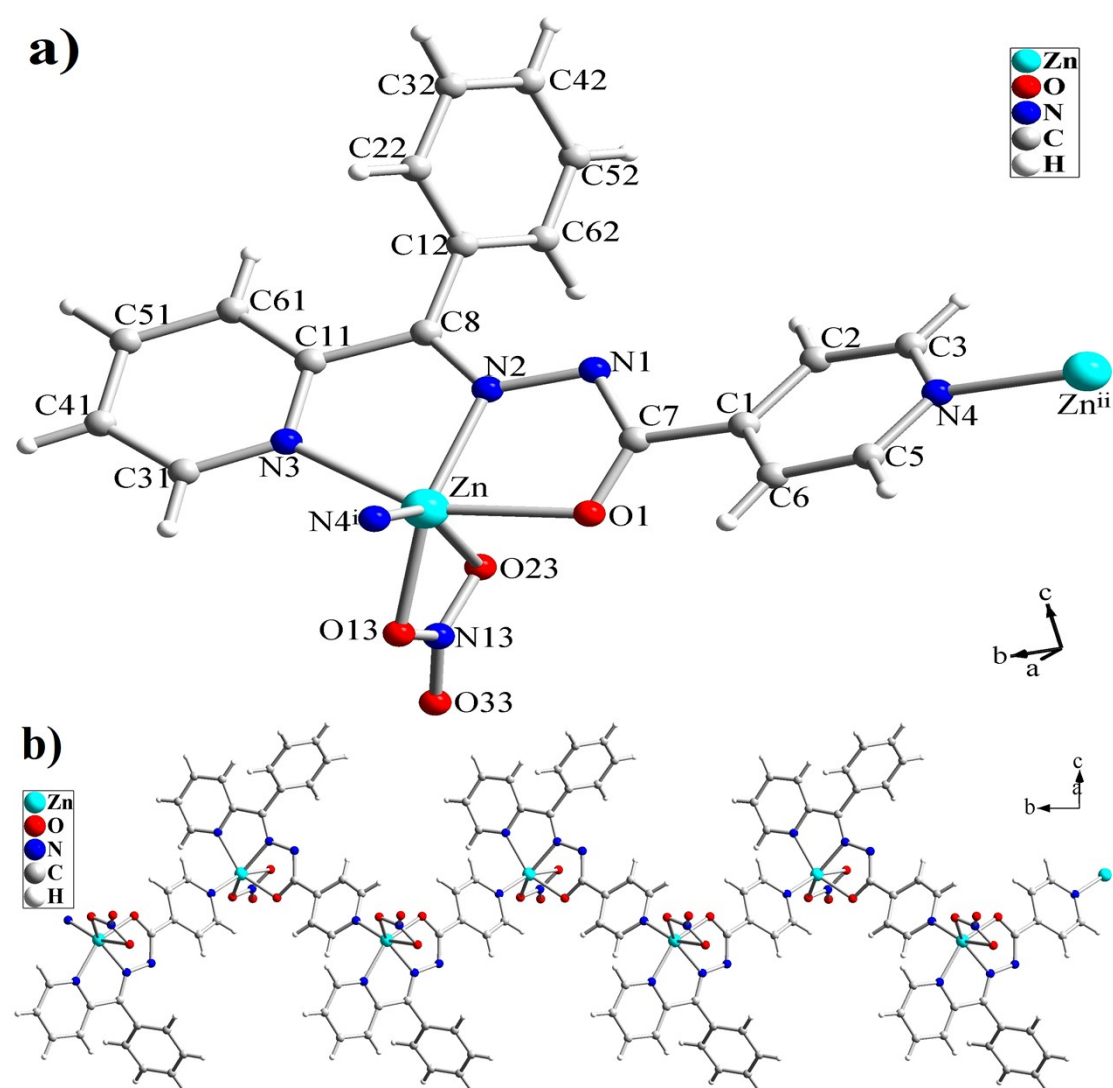

**Fig. S1.** a) Asymmetric unit of  $[\text{ZnL}(\text{NO}_3)]_n$ ; b) a view of one-dimensional polymeric chain in the structure of  $[\text{ZnL}(\text{NO}_3)]_n$ .

\* Corresponding author. E-mail addresses: [Bikas@sci.ikiu.ac.ir](mailto:Bikas@sci.ikiu.ac.ir); [bikas\\_r@yahoo.com](mailto:bikas_r@yahoo.com) (R. Bikas).

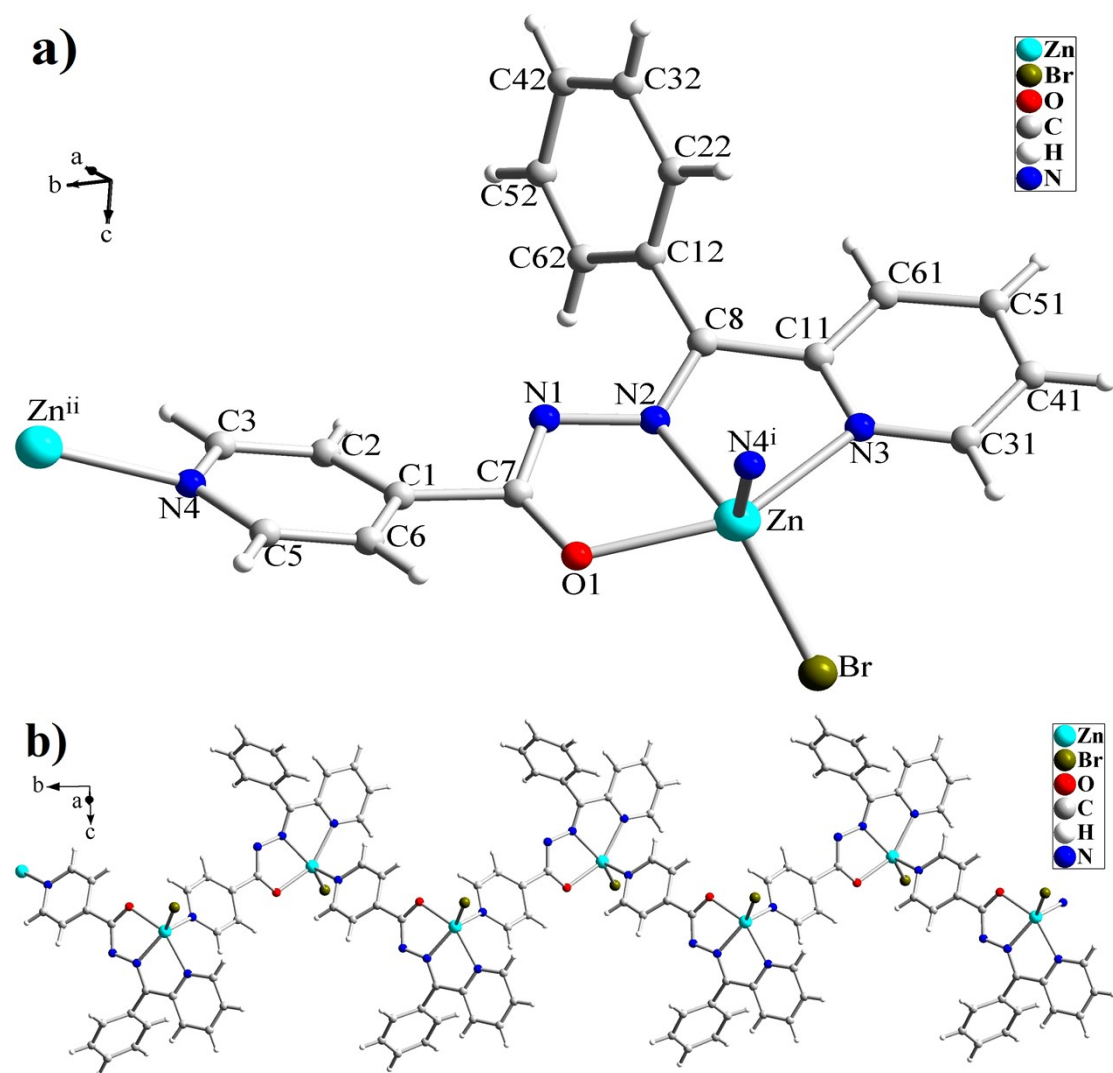

**Fig. S2.** a) Asymmetric unit of  $[\text{ZnLBr}]_n$ ; b) a view of one-dimensional polymeric chain in the structure of  $[\text{ZnLBr}]_n$ .

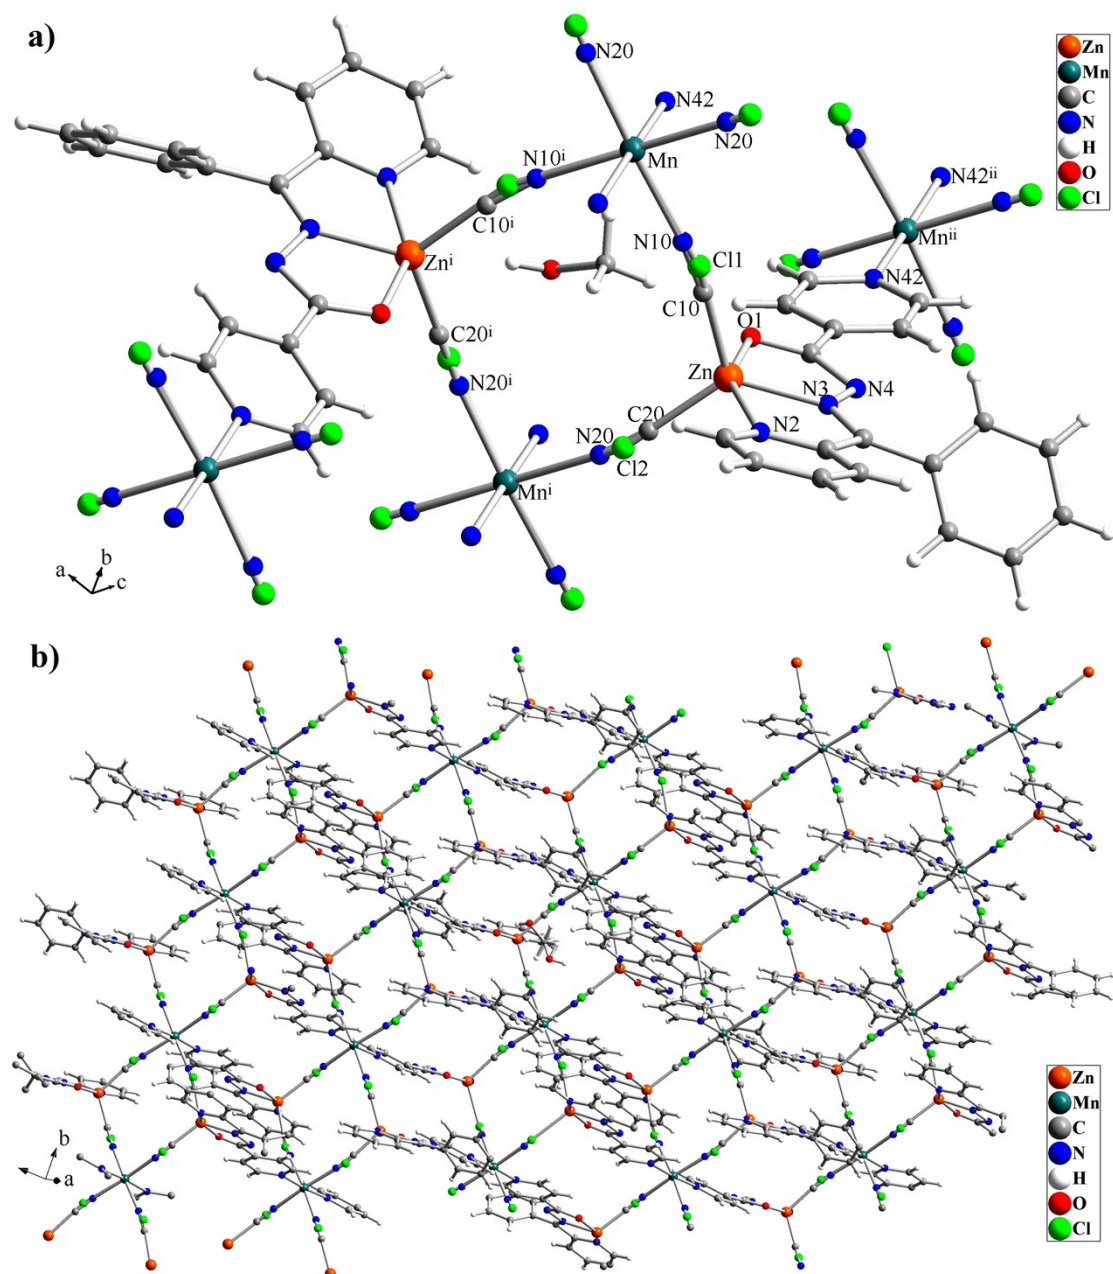

**Fig. S3.** a) Molecular structure of  $\{[\text{Zn}(\mu\text{-L})(\mu\text{-NC})_{1.75}(\mu\text{-Cl})_{0.25}\text{Mn}_{0.5}]\cdot(\text{CH}_3\text{OH})\}_n$  (**1'**); and b) a view of two-dimensional polymeric network in its crystal.

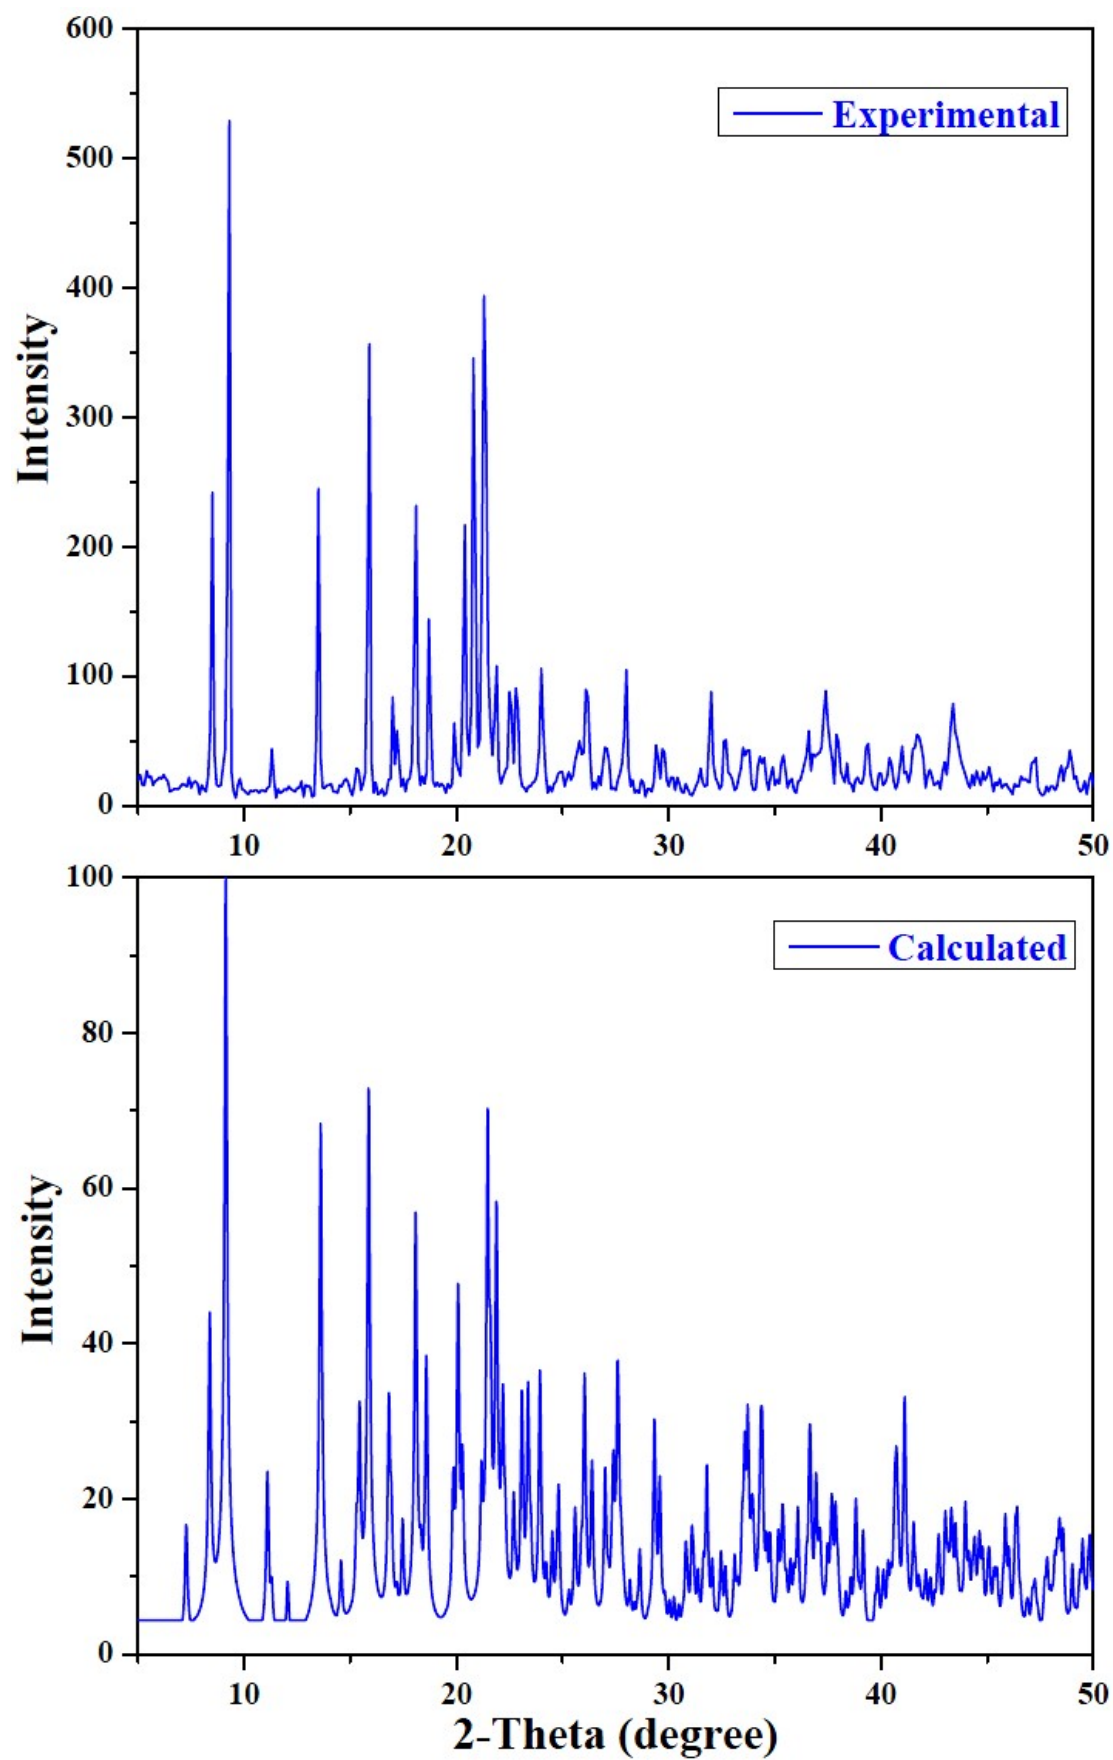

Fig. S4. Comparing experimental and simulated XRD patterns of the compound 1

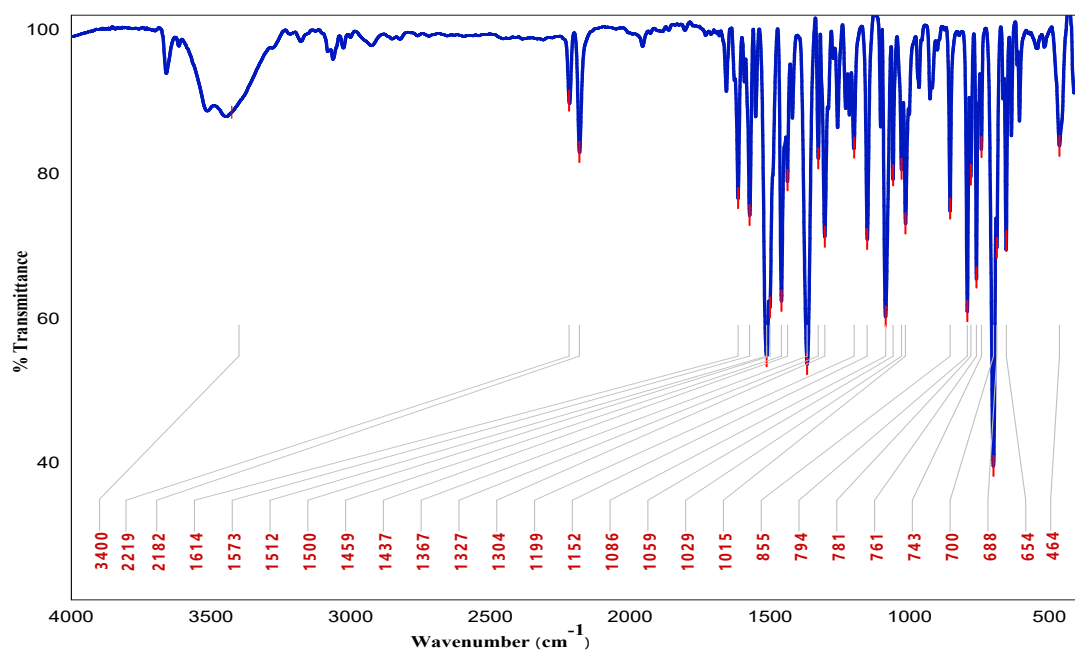

**Fig. S5.** The FT-IR spectra of compound **1** as KBr disk

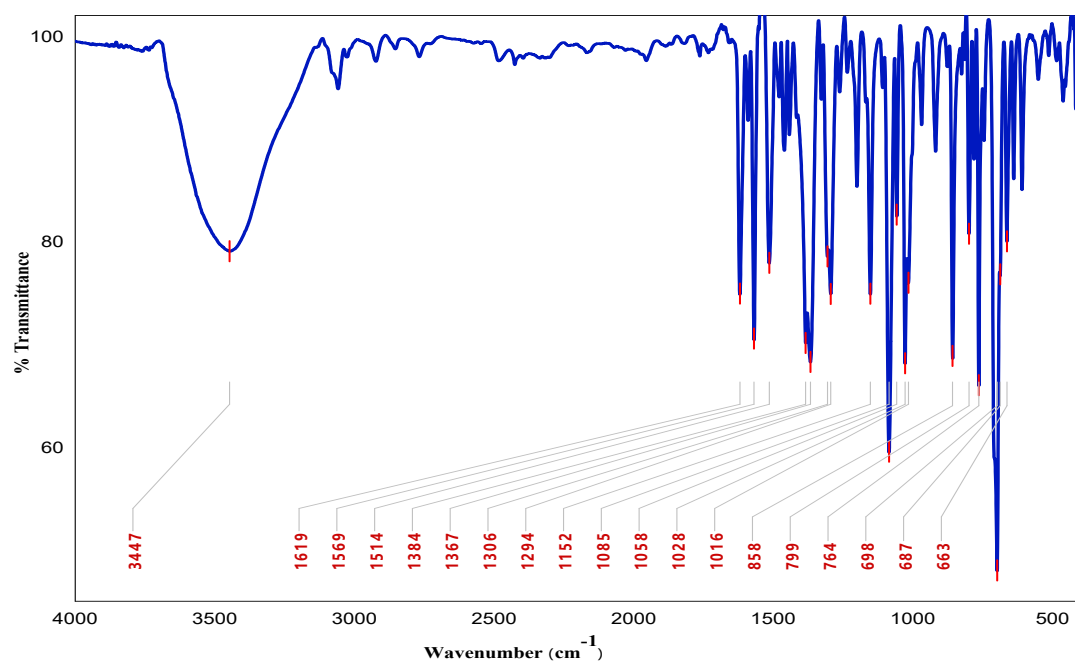

**Fig. S6.** The FT-IR spectra of compound  $[\text{ZnL}(\text{NO}_3)]_n$  as KBr disk

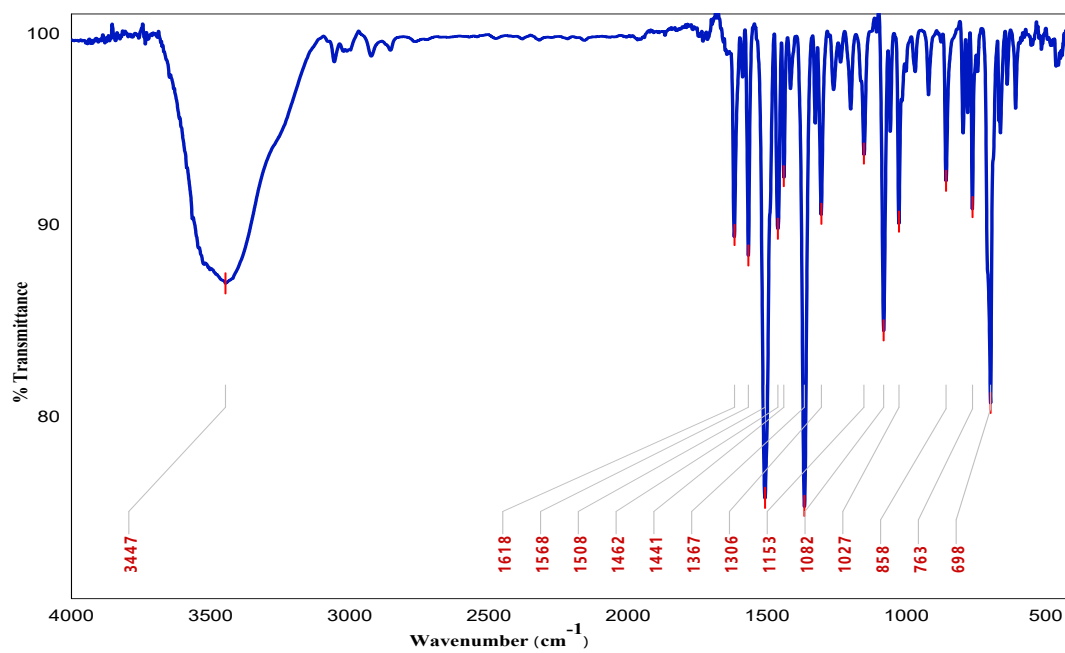

**Fig. S7.** The FT-IR spectra of compound  $[ZnLBr]_n$  as KBr disk

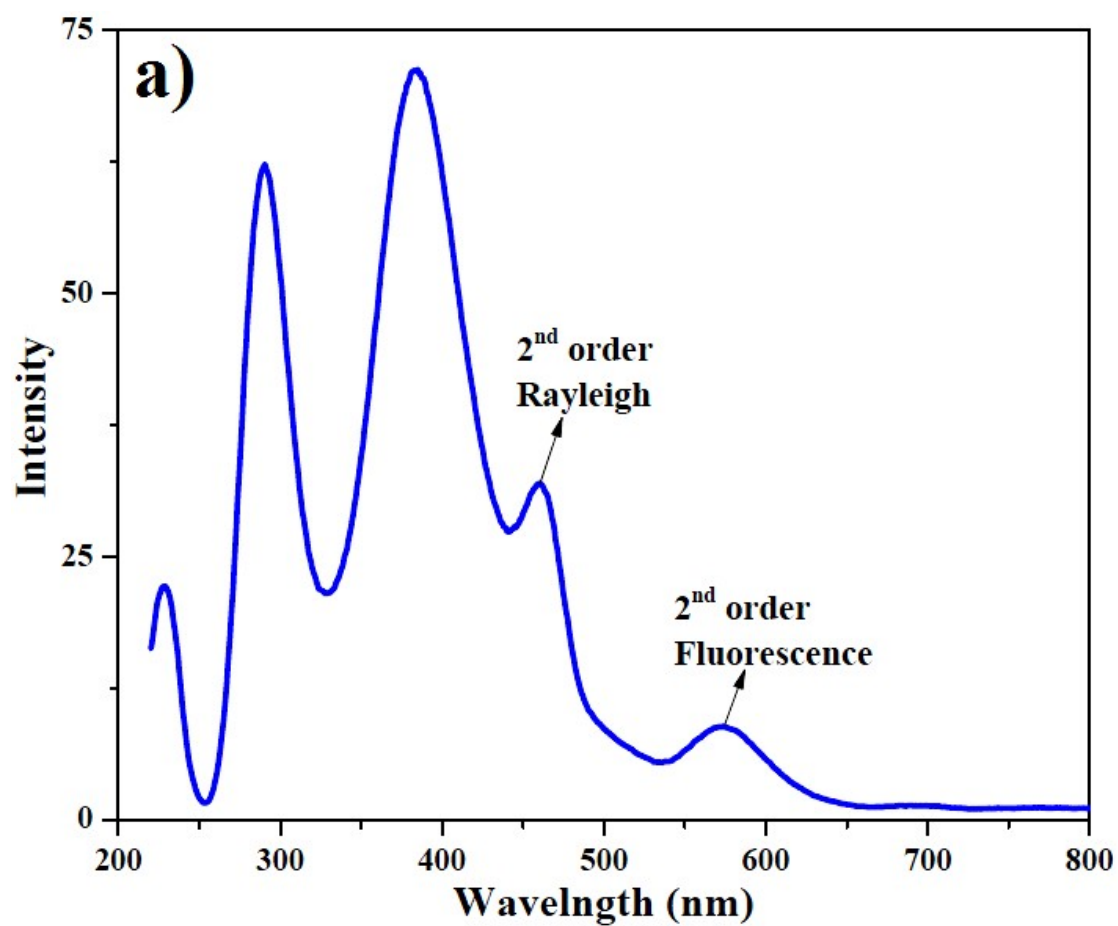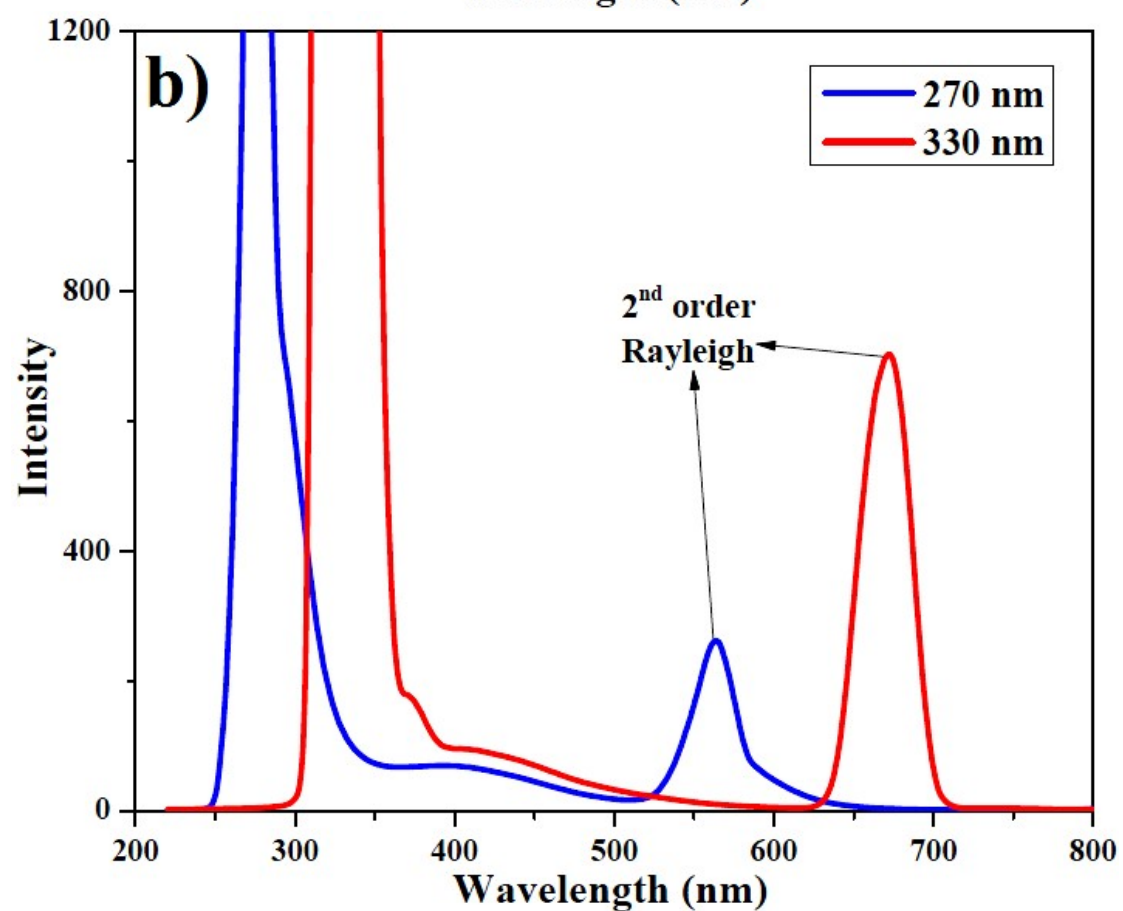

Fig. S8. Emission spectra of HL in methanol by excitation at a) 220; b) 270 and 330 nm

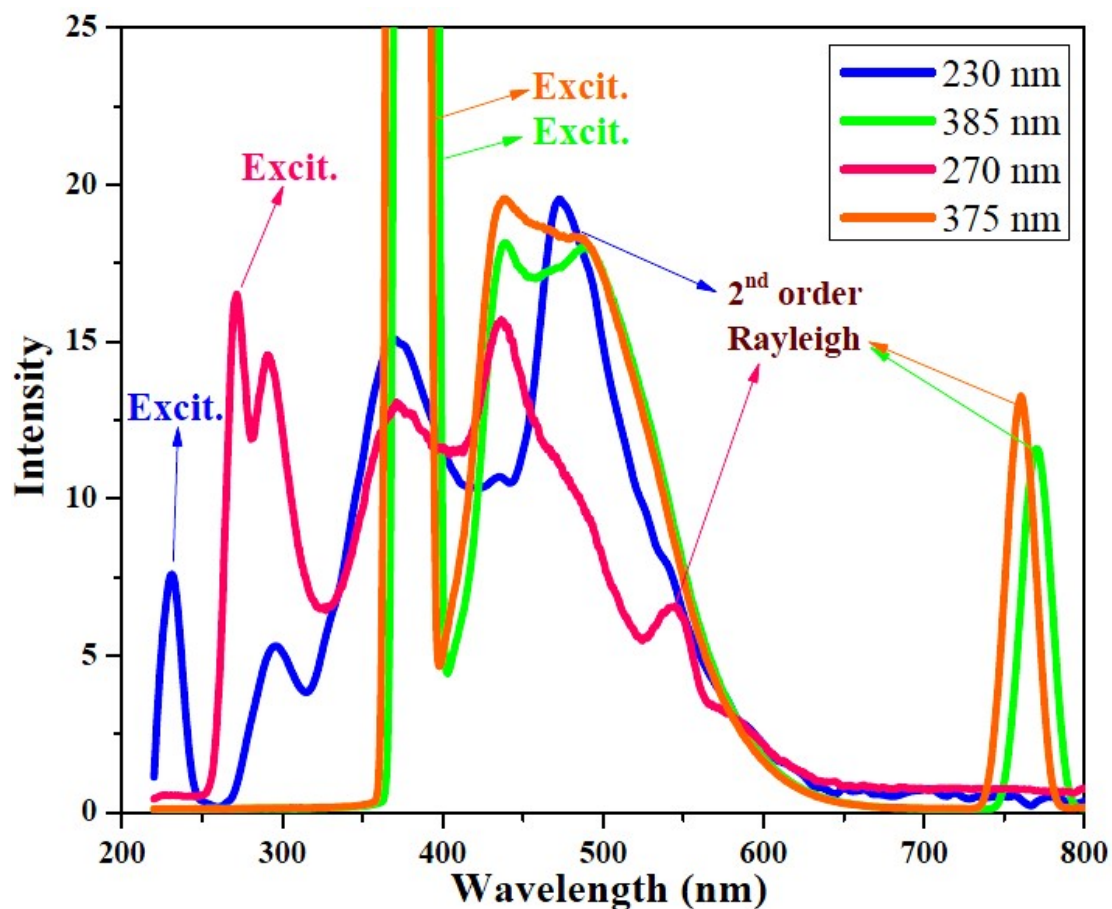

**Fig. S9.** Full emission spectra of compound **1** containing excitation bands, emission bands and 2<sup>nd</sup> Rayleigh scattering in the range of 200-800 nm. Excitation wavelengths: 230 nm (blue line), 270 nm (red line), 375 (orange line), and 385 nm (green line).



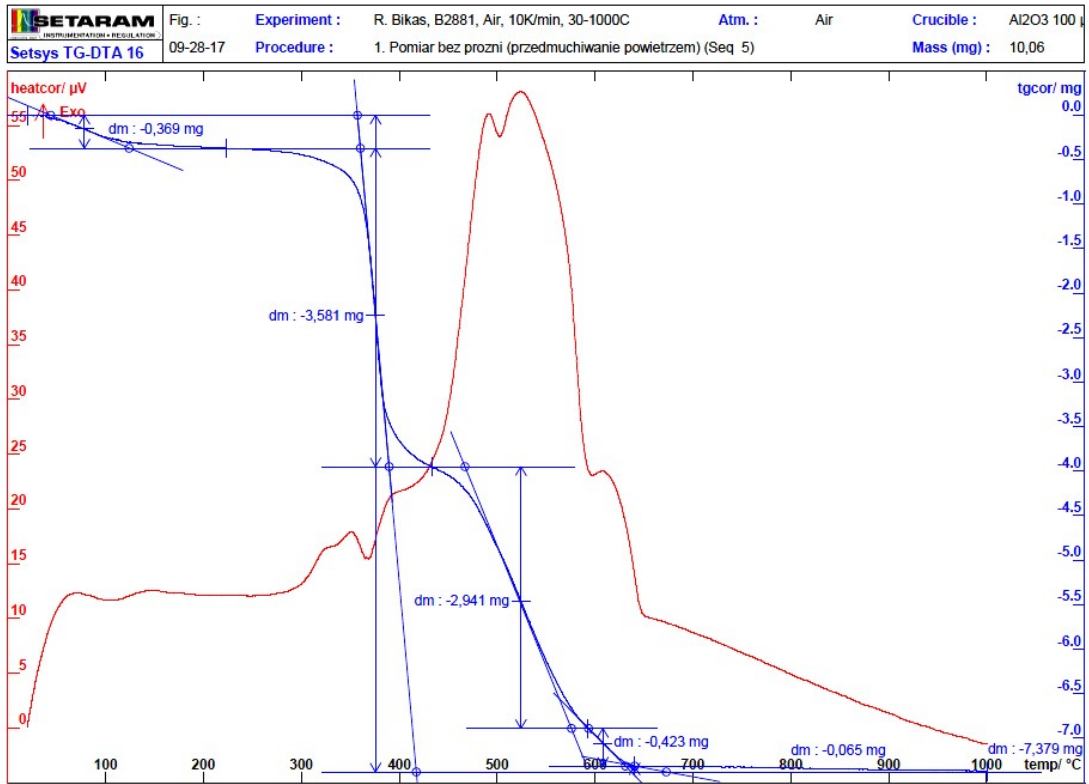

**Fig. S10.** TGA diagram of compound **1**

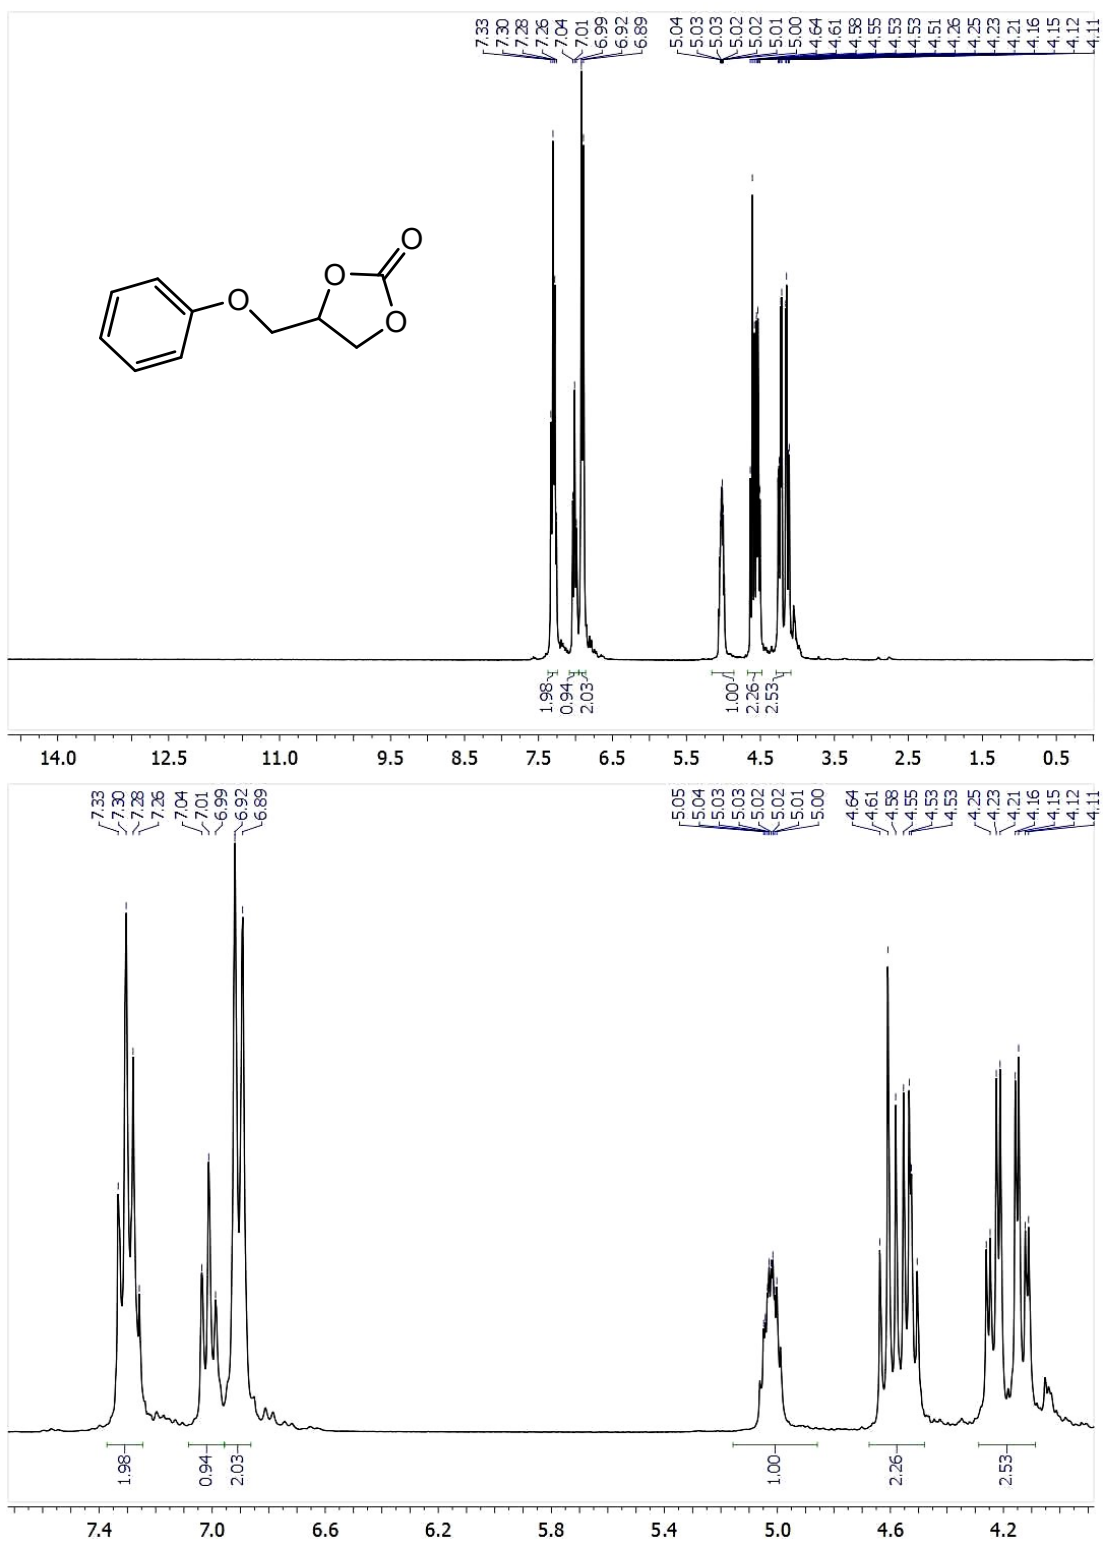

**Fig. S11.** <sup>1</sup>H NMR spectrum of 4-(phoxymethyl)-1,3-dioxolan-2-one in CDCl<sub>3</sub>

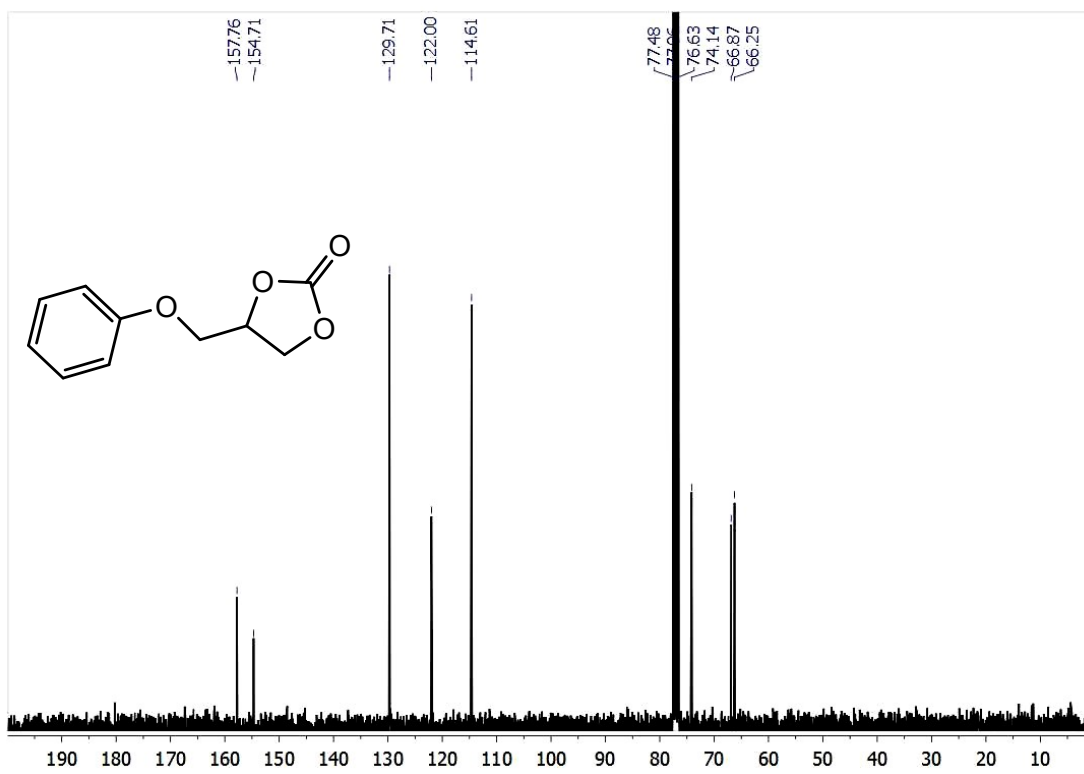

**Fig. S12.**  $^{13}\text{C}$  NMR spectrum of 4-(phenoxy)methyl-1,3-dioxolan-2-one in  $\text{CDCl}_3$

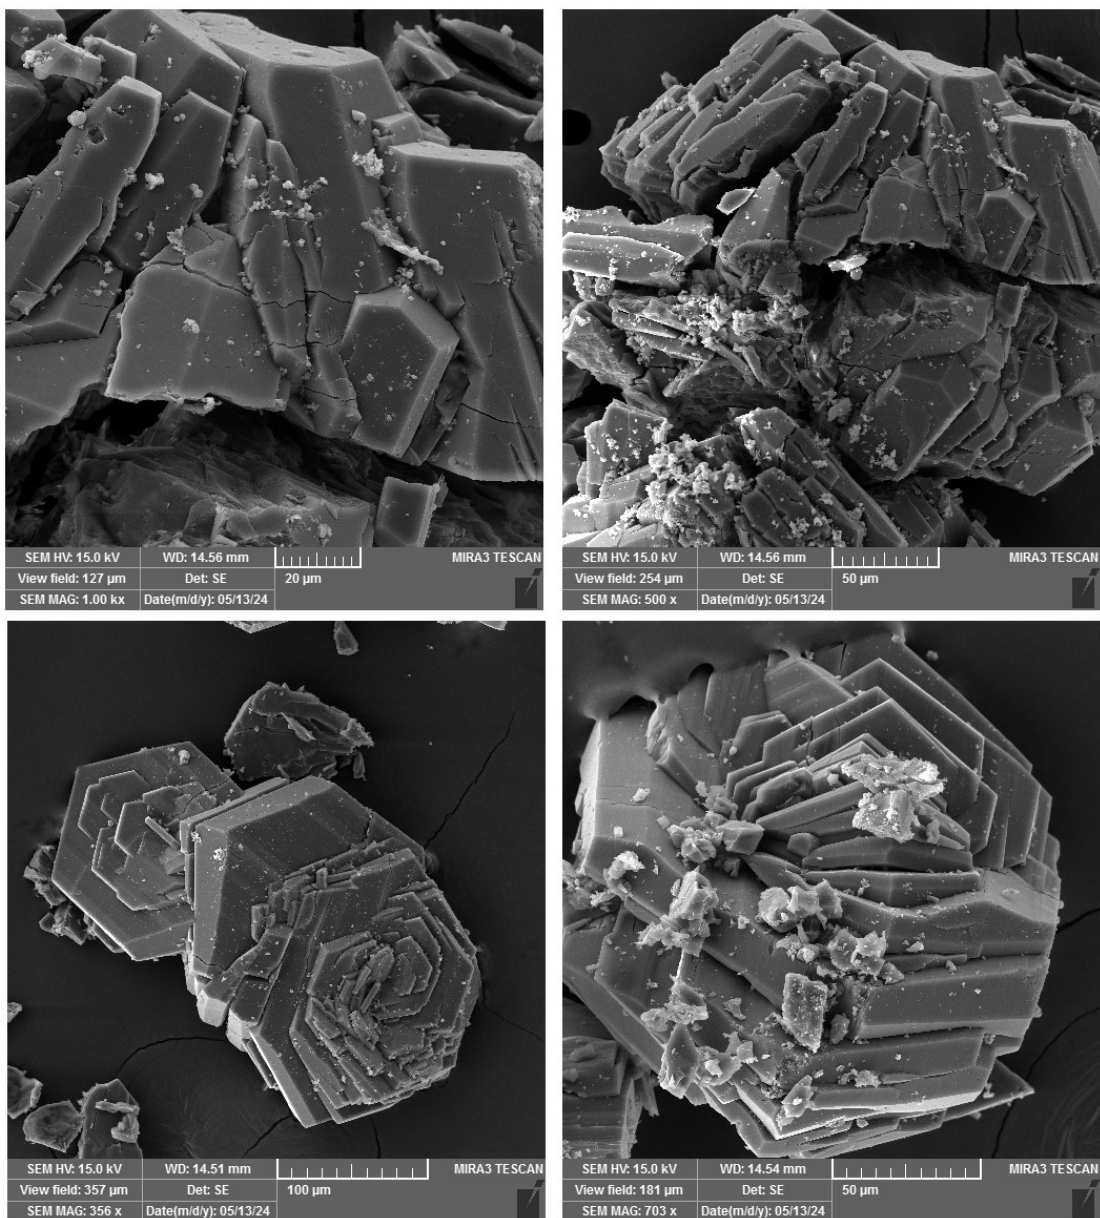

**Fig. S13.** SEM images of the powdered shape of compound 1 with different magnifications

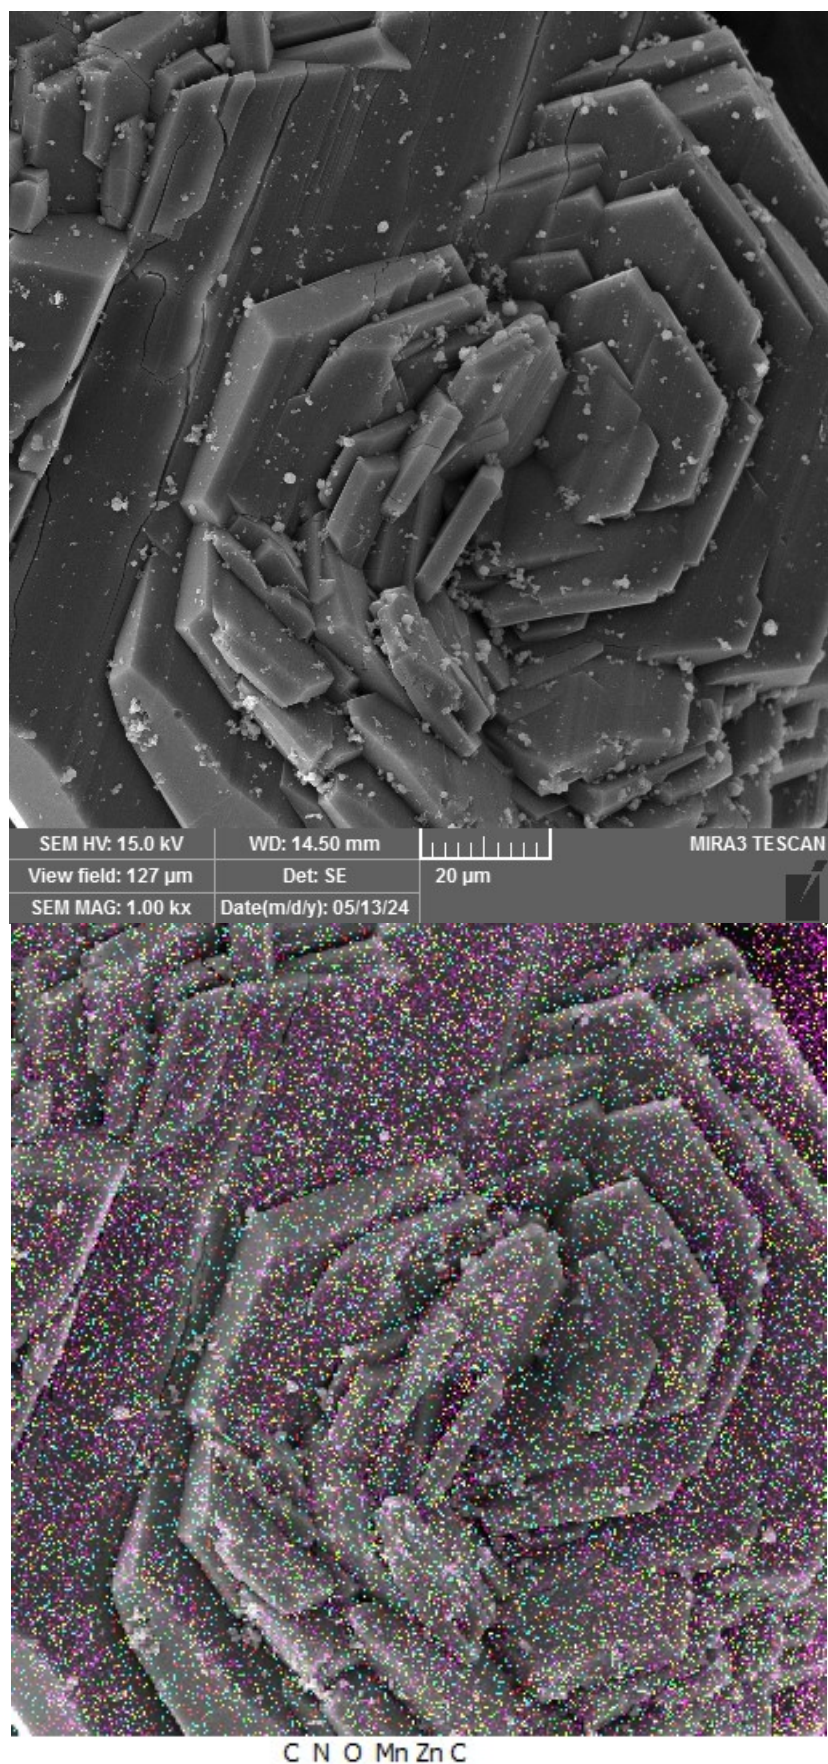

**Fig. S14.** Expanded SEM image of the region used for EDX analysis which is shown as inset in Fig. 7a

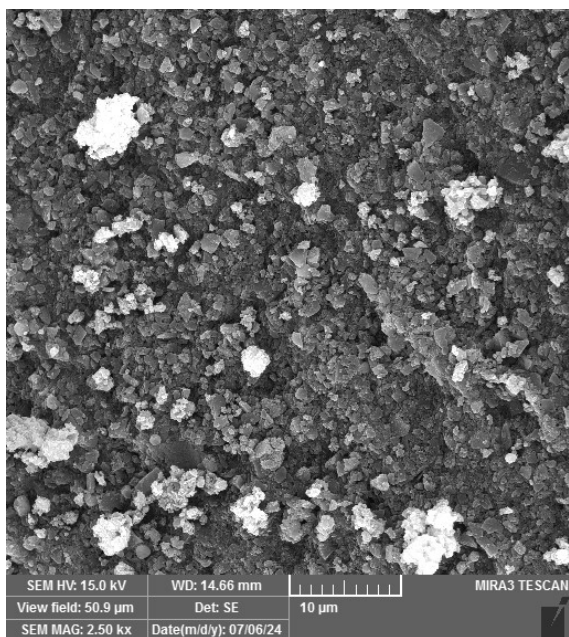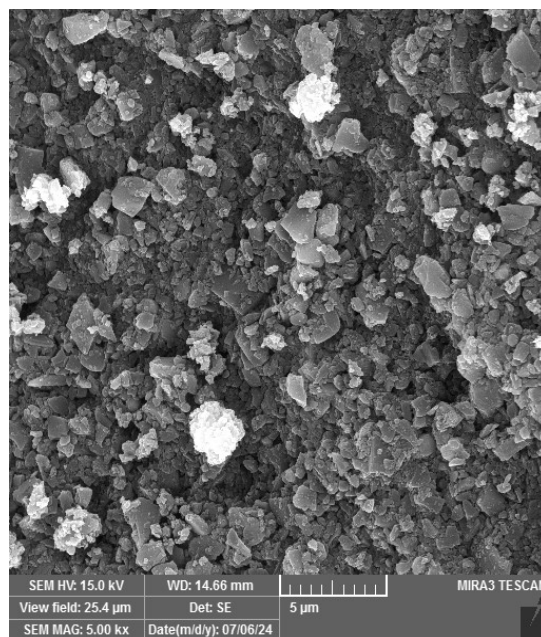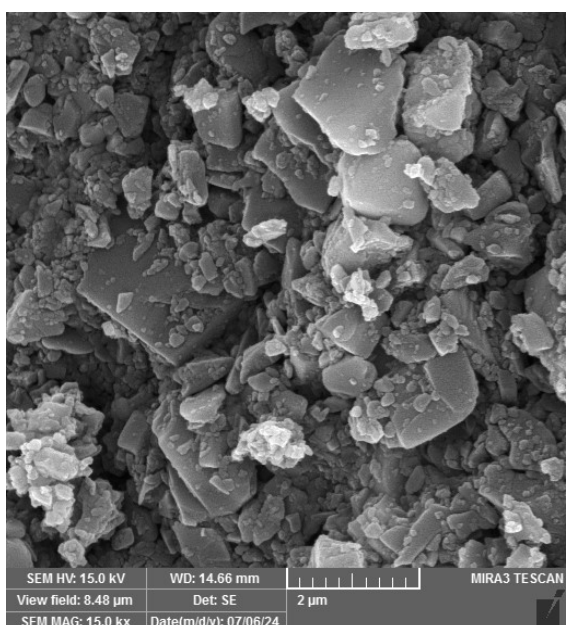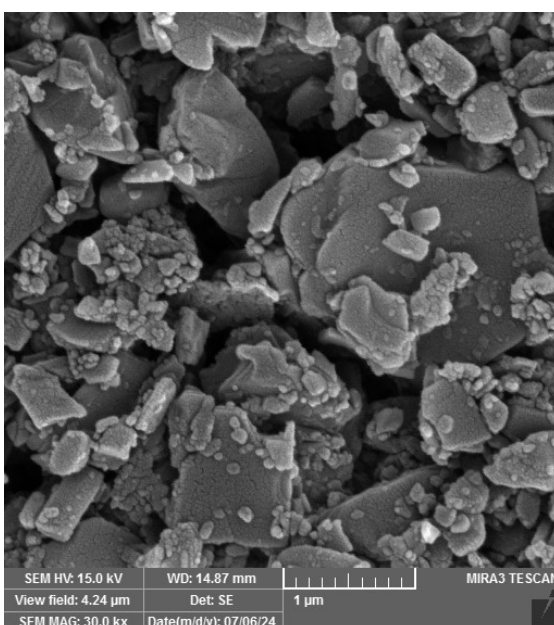

**Fig. S15.** SEM images with different magnifications of the recovered compound 1 after catalytic reactions

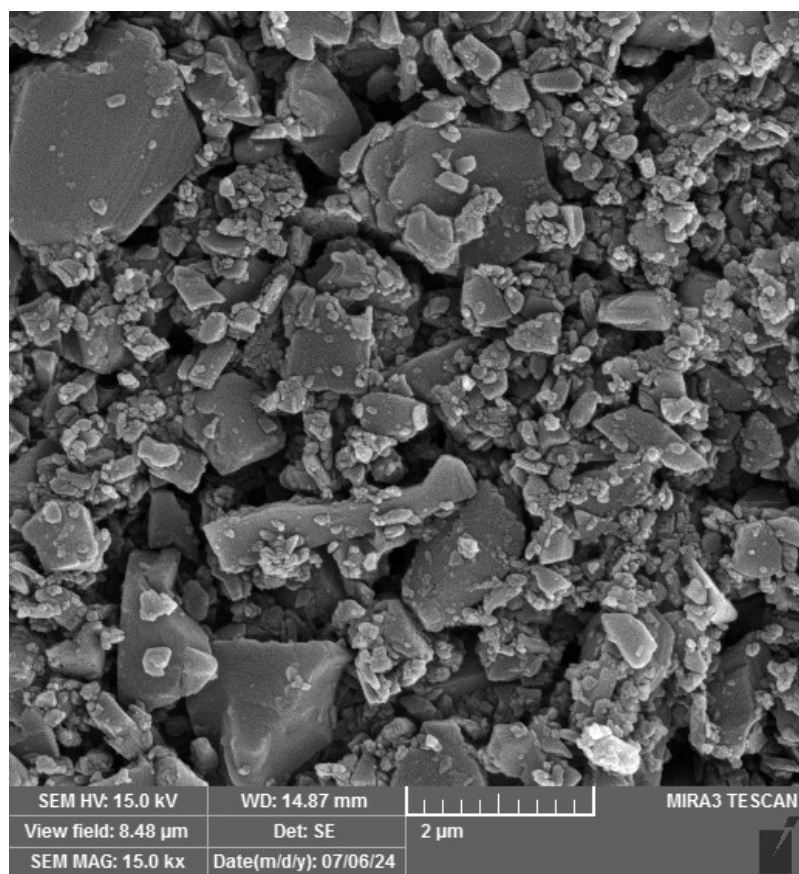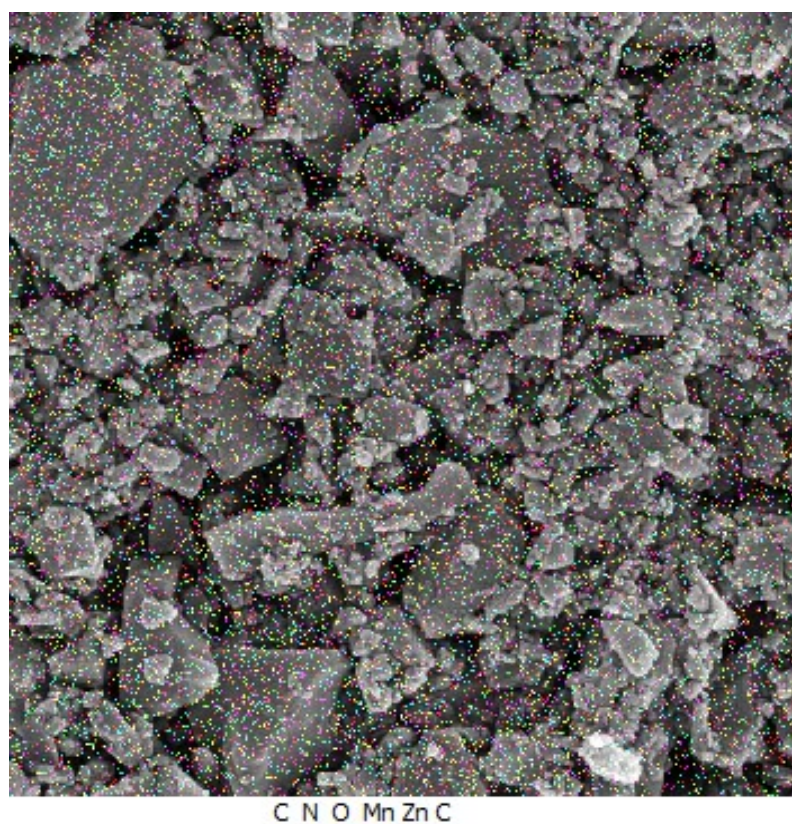

**Fig. S16.** Expanded SEM image of the region used for EDX analysis in the recovered catalyst which is shown as inset in Fig. 7b

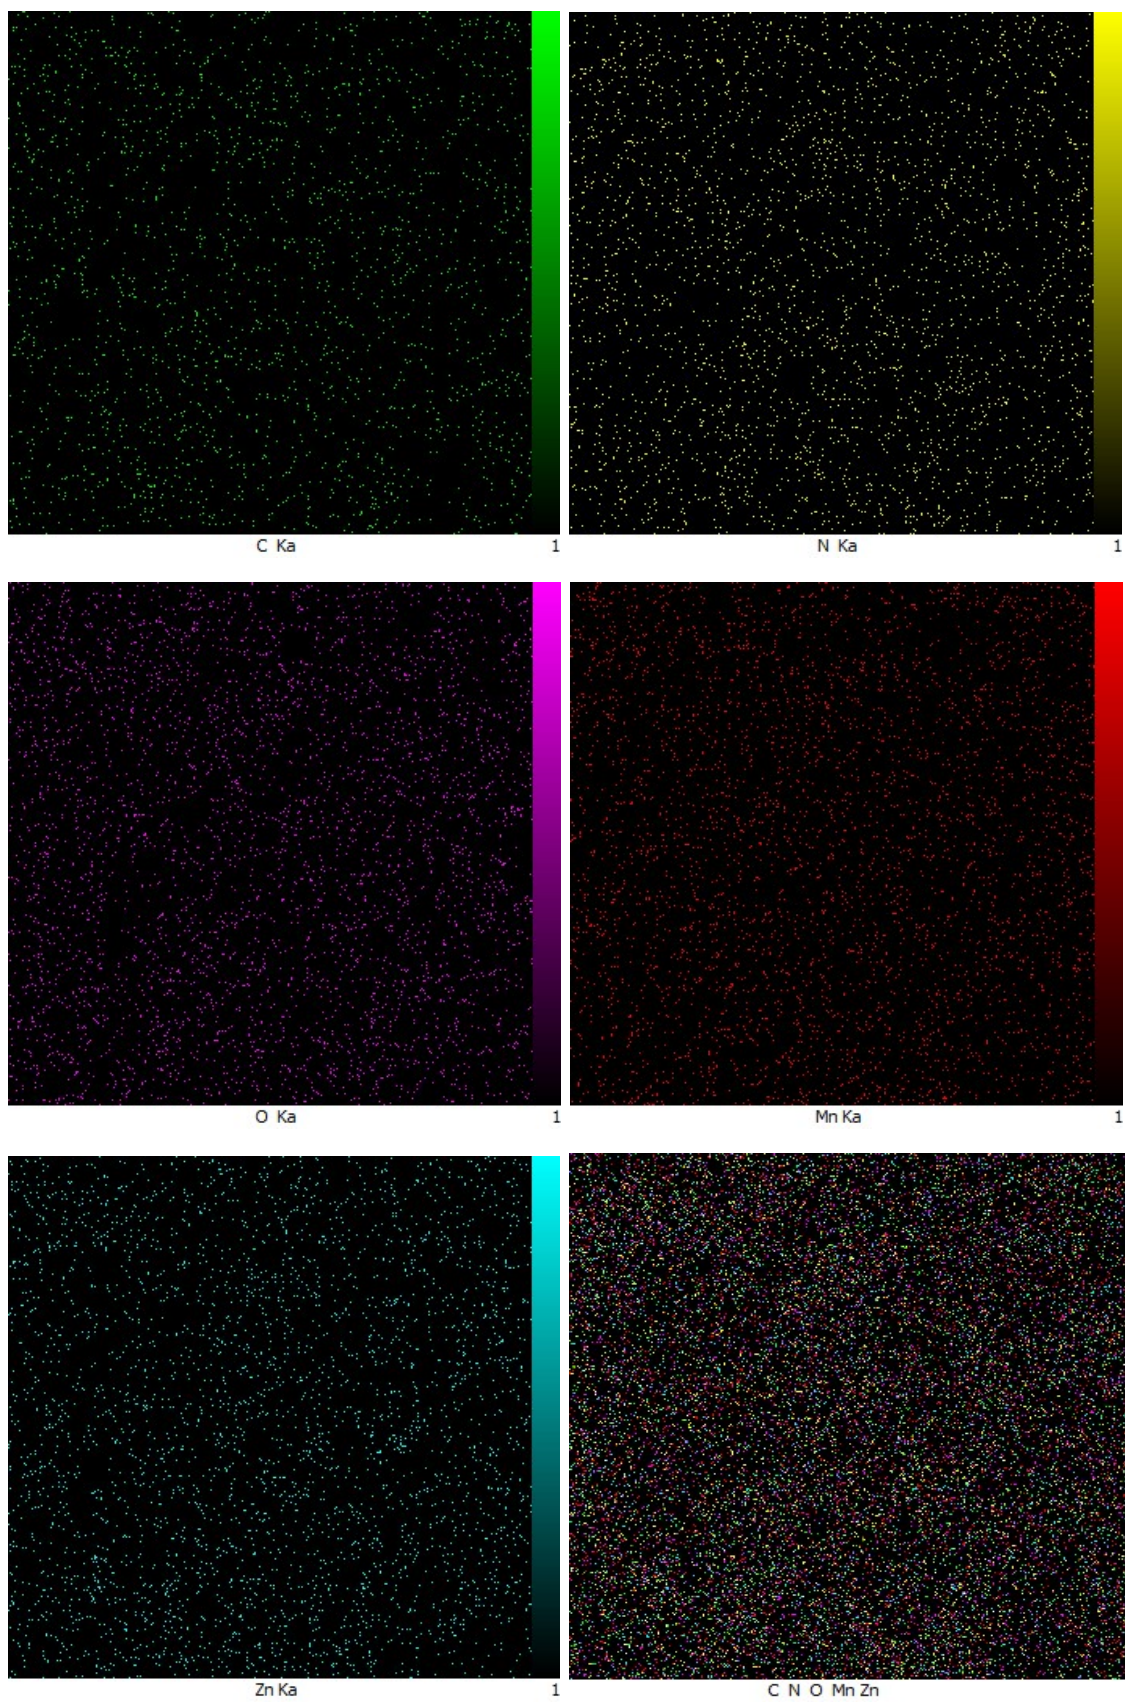

**Fig. S17.** Energy-dispersive X-ray spectroscopy (EDX) mapping images of the recovered catalyst after catalytic reaction



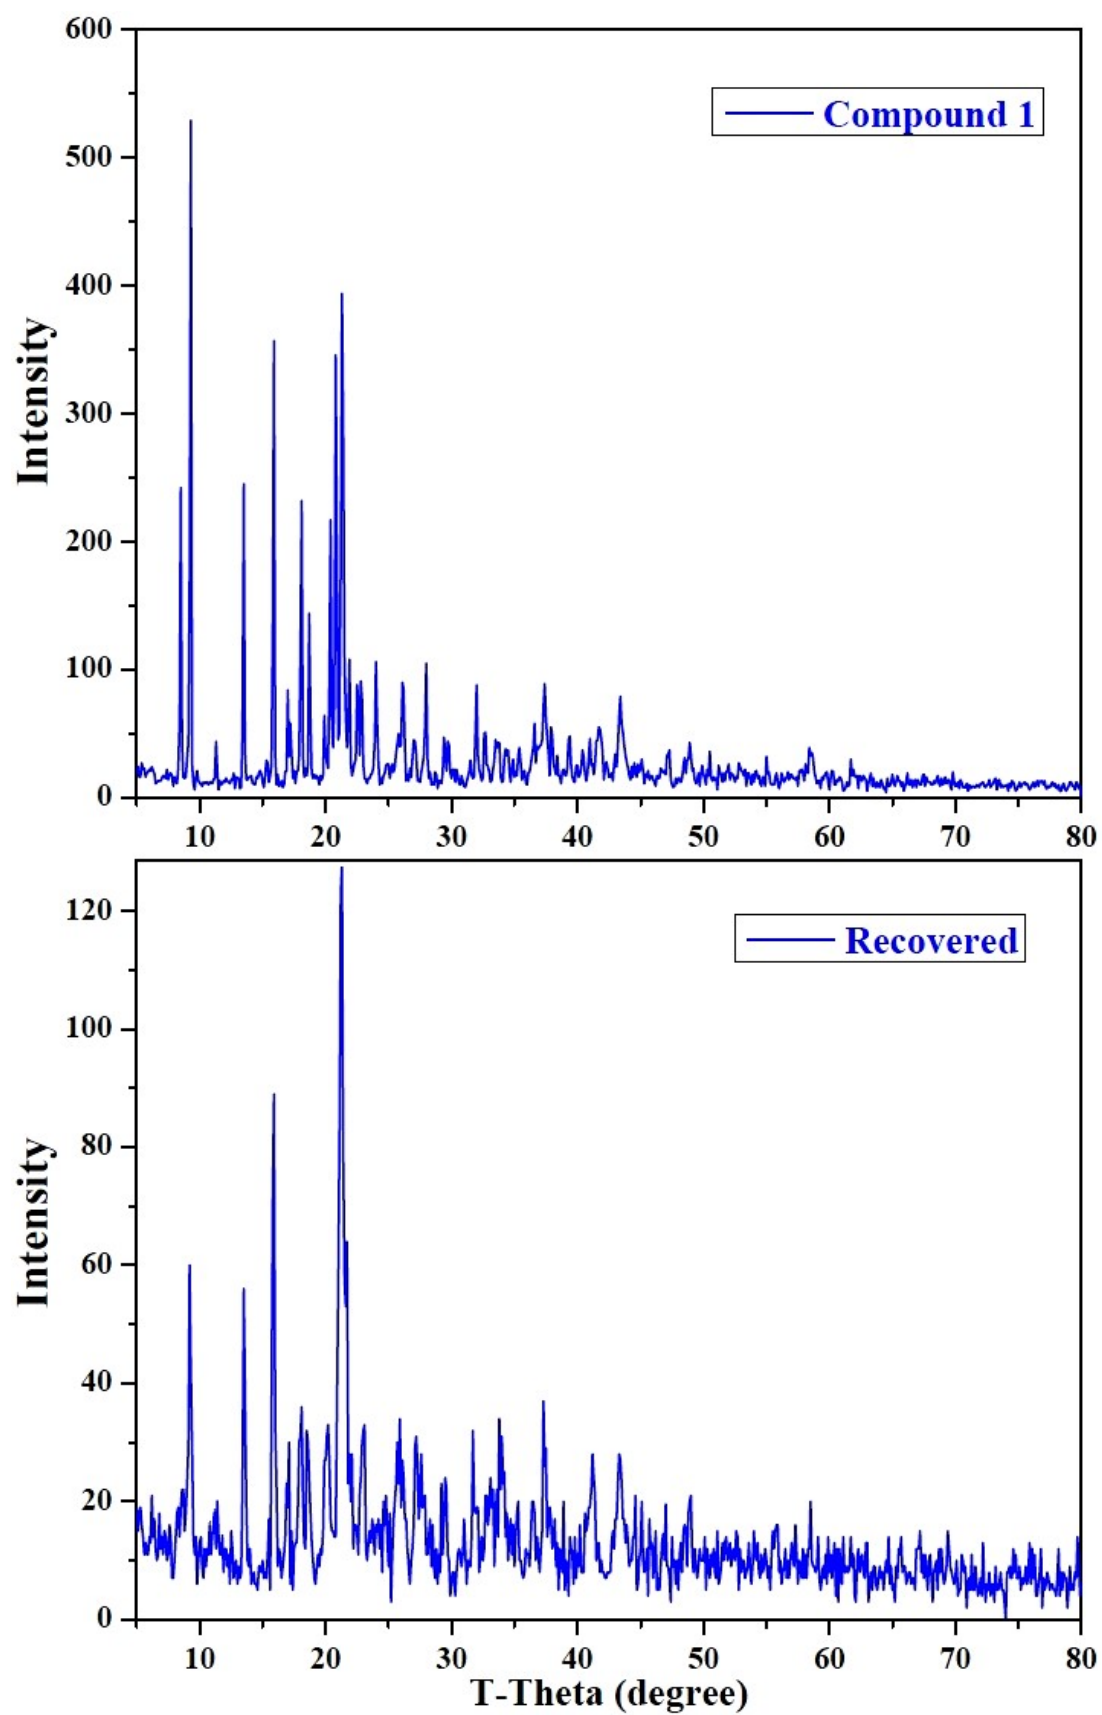

Fig. S18. Comparing XRD patterns of the fresh and recovered catalyst

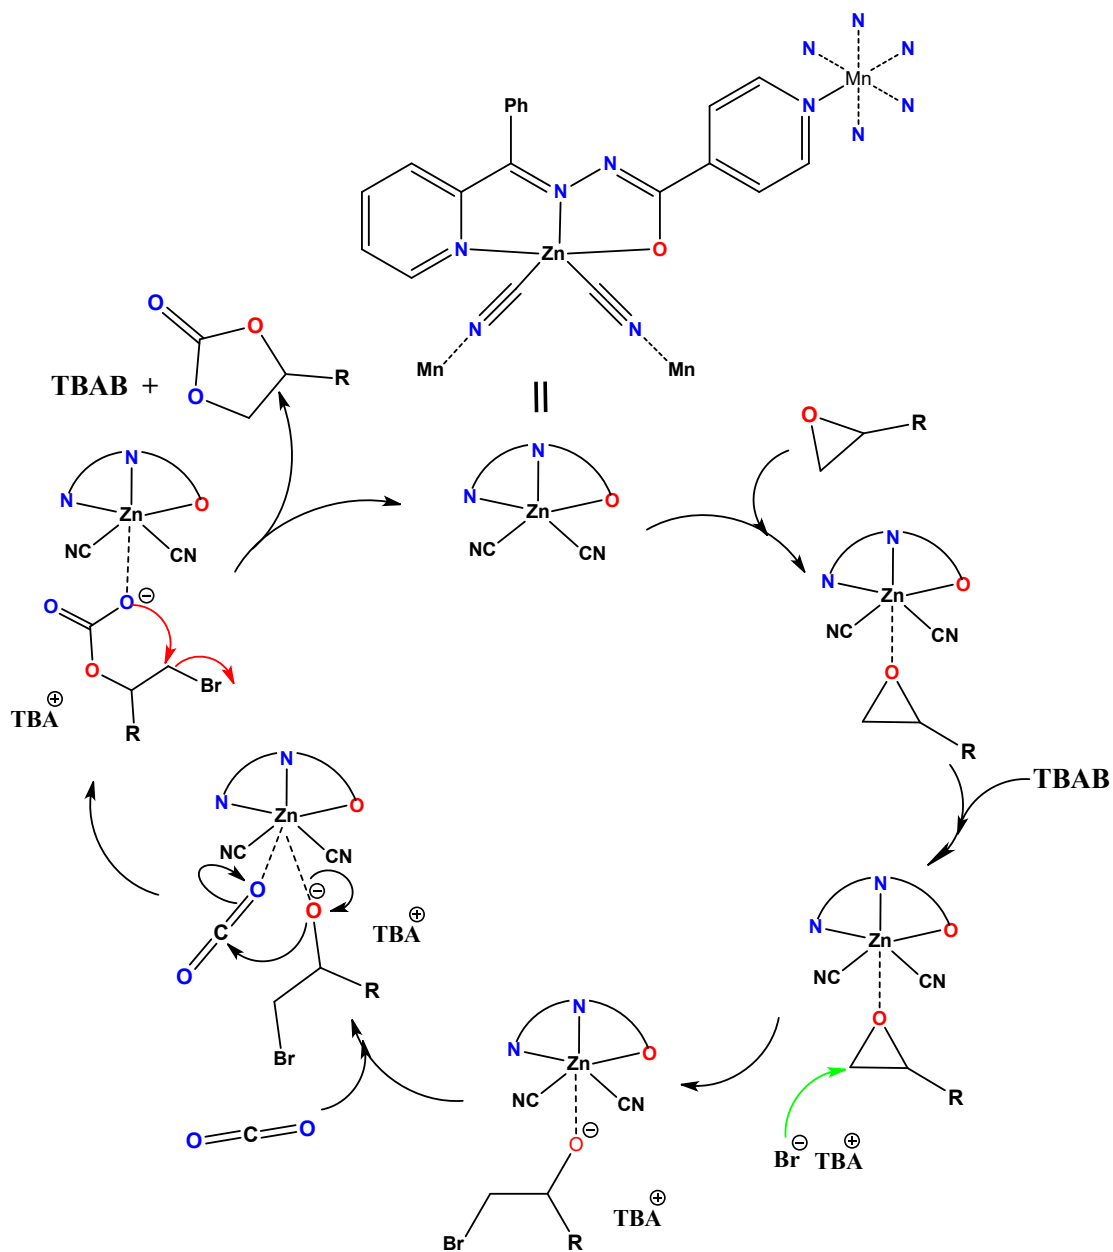

**Scheme S1.** Proposed mechanism for chemical CO<sub>2</sub> fixation reaction in the presence of compound **1** (Note: Only the Zn(II) core has been considered as the active site in this mechanism but, the manganese ion can also involve in the reaction)

**Table S1.** Crystal data and structure refinement for [ZnL(NO<sub>3</sub>)<sub>n</sub>], [ZnLBr]<sub>n</sub> and 1'

| Compound                                                        | [ZnL(NO <sub>3</sub> ) <sub>n</sub> ]                                                  | [ZnLBr] <sub>n</sub>                                 | Compound 1'                                                                                                                      |
|-----------------------------------------------------------------|----------------------------------------------------------------------------------------|------------------------------------------------------|----------------------------------------------------------------------------------------------------------------------------------|
| CCDC No.                                                        | 2340736                                                                                | 2340734                                              | 2340733                                                                                                                          |
| net formula                                                     | C <sub>18</sub> H <sub>13</sub> N <sub>5</sub> O <sub>4</sub> Zn·C<br>H <sub>4</sub> O | C <sub>18</sub> H <sub>13</sub> BrN <sub>4</sub> OZn | C <sub>39.5</sub> H <sub>26</sub> Cl <sub>0.5</sub> MnN <sub>11</sub> .<br>5O <sub>2</sub> Zn <sub>2</sub> ·2(CH <sub>4</sub> O) |
| <i>M<sub>r</sub></i> /g mol <sup>-1</sup>                       | 460.74                                                                                 | 446.60                                               | 961.30                                                                                                                           |
| crystal size/mm                                                 | 0.53×0.48×0.40                                                                         | 0.14×0.04×0.02                                       | 0.30 × 0.26 × 0.07                                                                                                               |
| T/K                                                             | 80                                                                                     | 80                                                   | 100                                                                                                                              |
| crystal shape, color                                            | Block, orange                                                                          | Block, orange                                        | Plate, Yellow                                                                                                                    |
| crystal system                                                  | Orthorhombic                                                                           | Orthorhombic                                         | Orthorhombic                                                                                                                     |
| space group                                                     | <i>P2<sub>1</sub>2<sub>1</sub>2<sub>1</sub></i>                                        | <i>P2<sub>1</sub>2<sub>1</sub>2<sub>1</sub></i>      | <i>Pbcn</i>                                                                                                                      |
| Absorption correction                                           | Analytical                                                                             | Analytical                                           | Analytical                                                                                                                       |
| <i>a</i> /Å                                                     | 8.5902(18)                                                                             | 8.7892(19)                                           | 24.344(6)                                                                                                                        |
| <i>b</i> /Å                                                     | 12.838(3)                                                                              | 13.133(3)                                            | 8.2169(18)                                                                                                                       |
| <i>c</i> /Å                                                     | 17.558(4)                                                                              | 16.077(4)                                            | 21.057(6)                                                                                                                        |
| <i>V</i> /Å <sup>3</sup>                                        | 1936.3(8)                                                                              | 1855.7(7)                                            | 4212.1(18)                                                                                                                       |
| <i>Z</i>                                                        | 4                                                                                      | 4                                                    | 4                                                                                                                                |
| <i>D<sub>x</sub></i> /Mg m <sup>-3</sup>                        | 1.580                                                                                  | 1.599                                                | 1.516                                                                                                                            |
| <i>μ</i> /mm <sup>-1</sup>                                      | 1.31                                                                                   | 3.49                                                 | 1.51                                                                                                                             |
| <i>F</i> (000)                                                  | 944                                                                                    | 888                                                  | 1956                                                                                                                             |
| Measured reflections                                            | 8625                                                                                   | 4979                                                 | 19539                                                                                                                            |
| Independent reflections                                         | 5029                                                                                   | 3173                                                 | 5985                                                                                                                             |
| Reflections with <i>I</i> > 2σ( <i>I</i> )                      | 4793                                                                                   | 1378                                                 | 4706                                                                                                                             |
| Parameters                                                      | 277                                                                                    | 142                                                  | 300                                                                                                                              |
| <i>R</i> <sub>int</sub>                                         | 0.017                                                                                  | 0.116                                                | 0.032                                                                                                                            |
| Θ range/°                                                       | 2.0-30.2                                                                               | 2.0-25.5                                             | 2.7-25.0                                                                                                                         |
| <i>T</i> <sub>min</sub> , <i>T</i> <sub>max</sub>               | 0.601, 0.665                                                                           | 0.745, 0.923                                         | 0.712, 0.911                                                                                                                     |
| <i>H, k, l</i>                                                  | -11 ≤ <i>h</i> ≤ 5                                                                     | -6 ≤ <i>h</i> ≤ 10                                   | -32 ≤ <i>h</i> ≤ 23                                                                                                              |
|                                                                 | -18 ≤ <i>k</i> ≤ 14                                                                    | -15 ≤ <i>k</i> ≤ 15                                  | -9 ≤ <i>k</i> ≤ 11                                                                                                               |
|                                                                 | -24 ≤ <i>l</i> ≤ 13                                                                    | -19 ≤ <i>l</i> ≤ 19                                  | -29 ≤ <i>l</i> ≤ 19                                                                                                              |
| <i>R</i> [ <i>F</i> <sup>2</sup> > 2σ( <i>F</i> <sup>2</sup> )] | 0.033                                                                                  | 0.094                                                | 0.046                                                                                                                            |
| <i>R<sub>w</sub></i> ( <i>F</i> <sup>2</sup> )                  | 0.082                                                                                  | 0.183                                                | 0.100                                                                                                                            |
| <i>S</i>                                                        | 1.10                                                                                   | 0.96                                                 | 1.10                                                                                                                             |
| Shift/error <sub>max</sub>                                      | 0.001                                                                                  | 0.001                                                | 0.001                                                                                                                            |
| Max electron density/e Å <sup>-3</sup>                          | 0.46                                                                                   | 1.45                                                 | 0.45                                                                                                                             |
| Min electron density/e Å <sup>-3</sup>                          | -0.43                                                                                  | -0.95                                                | -0.39                                                                                                                            |

**Table S2.** Selected bond lengths (Å) and angles (°) in [ZnL(NO<sub>3</sub>)]<sub>n</sub>

| <b>Bond</b>            | <b>Length/Å</b> | <b>Bond</b>            | <b>Length/Å</b> |
|------------------------|-----------------|------------------------|-----------------|
| Zn–O13                 | 2.026(3)        | C3–N4                  | 1.338(4)        |
| Zn–N2                  | 2.057(2)        | N4–C5                  | 1.341(4)        |
| Zn–N4 <sup>i</sup>     | 2.068(2)        | N4–Zn <sup>ii</sup>    | 2.068(2)        |
| Zn–O1                  | 2.084(2)        | C7–O1                  | 1.265(3)        |
| Zn–N3                  | 2.154(3)        | C7–N1                  | 1.333(4)        |
| O13–N13                | 1.247(5)        | N1–N2                  | 1.380(3)        |
| O23–N13                | 1.251(4)        | N2–C8                  | 1.282(4)        |
| N13–O33                | 1.208(5)        |                        |                 |
| <b>Angle</b>           | <b>Deg/°</b>    | <b>Angle</b>           | <b>Deg/°</b>    |
| O13–Zn–N2              | 141.17(12)      | N4 <sup>i</sup> –Zn–O1 | 91.86(9)        |
| O13–Zn–N4 <sup>i</sup> | 101.21(11)      | O13–Zn–N3              | 100.69(11)      |
| N2–Zn–N4 <sup>i</sup>  | 117.55(10)      | N2–Zn–N3               | 76.08(10)       |
| O13–Zn–O1              | 102.05(10)      | N4 <sup>i</sup> –Zn–N3 | 99.78(10)       |
| N2–Zn–O1               | 75.82(9)        | O1–Zn–N3               | 151.86(9)       |

Symmetry codes: (i)  $-x, y+1/2, -z+3/2$ ; (ii)  $-x, y-1/2, -z+3/2$ .**Table S3.** Selected bond lengths (Å) and angles (°) in [ZnLBr]<sub>n</sub>

| <b>Bond</b>            | <b>Length/Å</b> | <b>Bond</b>            | <b>Length/Å</b> |
|------------------------|-----------------|------------------------|-----------------|
| Zn–N2                  | 2.066(17)       | C3–N4                  | 1.32(2)         |
| Zn–N4 <sup>i</sup>     | 2.099(15)       | N4–C5                  | 1.38(2)         |
| Zn–O1                  | 2.108(12)       | N4–Zn <sup>ii</sup>    | 2.099(15)       |
| Zn–N3                  | 2.198(17)       | C7–N1                  | 1.33(3)         |
| Zn–Br                  | 2.375(4)        | N1–N2                  | 1.39(2)         |
| O1–C7                  | 1.27(2)         | N2–C8                  | 1.32(3)         |
| N3–C31                 | 1.35(2)         |                        |                 |
| <b>Angle</b>           | <b>Deg/°</b>    | <b>Angle</b>           | <b>Deg/°</b>    |
| N2–Zn–N4 <sup>i</sup>  | 107.5(7)        | O1–Zn–N3               | 151.3(6)        |
| N2–Zn–O1               | 76.1(6)         | N2–Zn–Br               | 139.0(5)        |
| N4 <sup>i</sup> –Zn–O1 | 90.9(6)         | N4 <sup>i</sup> –Zn–Br | 113.6(5)        |
| N2–Zn–N3               | 75.3(7)         | O1–Zn–Br               | 102.4(4)        |
| N4 <sup>i</sup> –Zn–N3 | 96.2(6)         | N3–Zn–Br               | 100.1(5)        |

Symmetry codes: (i)  $-x+2, y-1/2, -z+1/2$ ; (ii)  $-x+2, y+1/2, -z+1/2$ .**Table S4.** Hydrogen-bond geometry (Å, °) in the compound **1**

| <b>D–H···A</b> | <b>D–H</b> | <b>H···A</b> | <b>D···A</b> | <b>D–H···A</b> |
|----------------|------------|--------------|--------------|----------------|
| O1M–H1M···O1   | 0.84       | 2.00         | 2.805(5)     | 161            |
